# Supplementary material
Source: PubMed Central journal article supplement (PMC3123049)
Supplement: supp_M111.225631_Supplementary_material_Table_SI.pdf [file supp_M111.225631_Supplementary_material_Table_SI.pdf]

Table S1

Oligonucleotides used to generate TNFR2 mutants and deletions used in this work

| Receptor                   | Sequence 5'-3'                              | Primer Sense | Comments                                                                                                        | Template           |
|----------------------------|---------------------------------------------|--------------|-----------------------------------------------------------------------------------------------------------------|--------------------|
| pCMV1-FLAG-R2-Δ403         | CCGGT <u>ACCC</u> ATGGGCGCCCGTCG            | Sense        | <i>KpnI</i> site underlined                                                                                     | pCMV1-FLAG-TNFR2   |
|                            | AATCTAGATAAAGGAGAAGGGGACC                   | Antisense    | <i>XbaI</i> site underlined.<br>STOP codon bolded.                                                              |                    |
| pCMV1-FLAG-R2-Δ424         | CCGGT <u>ACCC</u> ATGGGCGCCCGTCG            | Sense        | <i>KpnI</i> site underlined                                                                                     | pCMV1-FLAG-TNFR2   |
|                            | AATCTAGATAACTCTTCGGTGCTCCCC                 | Antisense    | <i>XbaI</i> site underlined.<br>STOP codon bolded.                                                              |                    |
| pCMV1-FLAG-R2-Δ386-414     | CCGGT <u>ACCC</u> AGAGACCCTGTGG             | Sense        | <i>KpnI</i> site underlined                                                                                     | pCMV1-FLAG-TNFR2   |
|                            | CCGGTACCTGTGTCTCCATTGT                      | Antisense    | <i>KpnI</i> site underlined                                                                                     |                    |
| pCMV1-FLAG-R2-Δ343         | AATGCTGTAATAACCCCGCCCGTTGACGC               | Sense        | Anillates pCMV1-FLAG multiple cloning site                                                                      | pCMV1-FLAG-TNFR2   |
|                            | TCTAGATTAGCTAGCCCGGGCCTCC                   | Antisense    | <i>XbaI</i> site underlined.<br>STOP codon bolded.<br>Cloned into pCMV1-FLAG <i>KpnI</i> and <i>XbaI</i> sites. |                    |
| pCMV1-FLAG-R2-SKAA         | GGTCCCCTTCTCCAAGGCGGATGTGCTTCCG             | Sense        | Point mutations underlined                                                                                      | pCMV1-FLAG-TNFR2   |
|                            | CCGAAAGGCACATG <u>CCG</u> CCTTGAGAA GGGGACC | Antisense    |                                                                                                                 |                    |
| pCMV1-FLAG-R2-SKAA-STAA    | GCTGGGGAGC <u>ACC</u> GAGCGAAGCCCCCTGCC     | Sense        | Point mutations underlined                                                                                      | pCMV1-FLAG-R2-SKAA |
|                            | GGCAGGGGCTTCGCTGCGGTGCTCCCCAGC              | Antisense    |                                                                                                                 |                    |
| pCMV1-FLAG-R2-SKAA-AAA     | GAGCACCGAAGAGGGCGCCGCGCCCCCTTGG             | Sense        | Point mutations underlined                                                                                      | pCMV1-FLAG-R2-SKAA |
|                            | CCAAGGGGCGCGG <u>CCG</u> CCTCTTCGGTGCTC     | Antisense    |                                                                                                                 |                    |
| pCMV1-FLAG-R2-SKAA-Δ434    | GCCCCTTGAGTGCTGATTGAGGGATGAAGCCC            | Sense        | STOP codon underlined                                                                                           | pCMV1-FLAG-R2-SKAA |
|                            | GGGCTTCATCCCTCAATCAGGCACTCCAAGGGG           | Antisense    |                                                                                                                 |                    |
| pCMV1-FLAG-R2-Δ343-378     | GCTCCGCTAGCGCCAGCTCCACAATG                  | Sense        | <i>NheI</i> site underlined                                                                                     | pCMV1-FLAG-TNFR2   |
|                            | GCTCTAGATTAAGTGGGCTTCATCCCA GCATC           | Antisense    | <i>XbaI</i> site underlined<br>Cloned into pCMV1-FLAG-R2-Δ343                                                   |                    |
| pCMV1-FLAG-R2-BKO-Δ365-378 | AGCTGTCGACATGGGAGACACAGATTC                 | Sense        | <i>SalI</i> site underlined.<br>Digested and ligated                                                            | pCMV1-FLAG-R2-SKAA |
|                            | AGCTGTCGACGTTACAGATGCAGGTGACATTGAC          | Antisense    |                                                                                                                 |                    |
| pCMV1-FLAG-R2-BKO-Δ344-356 | AGCTGTCGACAATGTCACCTGCATCGTGAACGT           | Sense        | <i>SalI</i> site underlined.<br>Digested and ligated                                                            | pCMV1-FLAG-R2-SKAA |
|                            | AGCTGTCGACGCTGGCCCGGGCCTCCC                 | Antisense    |                                                                                                                 |                    |
| pCMV1-FLAG-R2-BKO-Δ350-378 | AGCTGTCGACGCCAGCTCCACAATG                   | Sense        | <i>SalI</i> site underlined.<br>Digested and ligated                                                            | pCMV1-FLAG-R2-SKAA |
|                            | AGCTGTCGACGGAAGAATCTGAGCTCCCGGTGCT          | Antisense    |                                                                                                                 |                    |
| pCMV1-FLAG-R2-BKO-AAD      | CAGCACCGGGGCGCAGATTCTTCCC                   | Sense        | Point mutations underlined                                                                                      | pCMV1-FLAG-R2-SKAA |
|                            | GGGCAGAATCTGCGGCCCGGTGCTG                   | Antisense    |                                                                                                                 |                    |
| pCMV1-FLAG-R2-BKO-DAA      | GAGCTCAGATGCTGCCCCCTGGTGGC                  | Sense        | Point mutations underlined                                                                                      | pCMV1-FLAG-R2-SKAA |
|                            | GCCACCAGGGGCAGCATCTGAGCTC                   | Antisense    |                                                                                                                 |                    |
